# Supplementary material
Source: PubMed Central journal article supplement (PMC3318838)

...aacgcgggtttcgcagaaacatgcgctagtagtattgatgacaacatgg  
actaagcaaaagtgcttgtcccctgacccaAGAAGGatgcttATG...

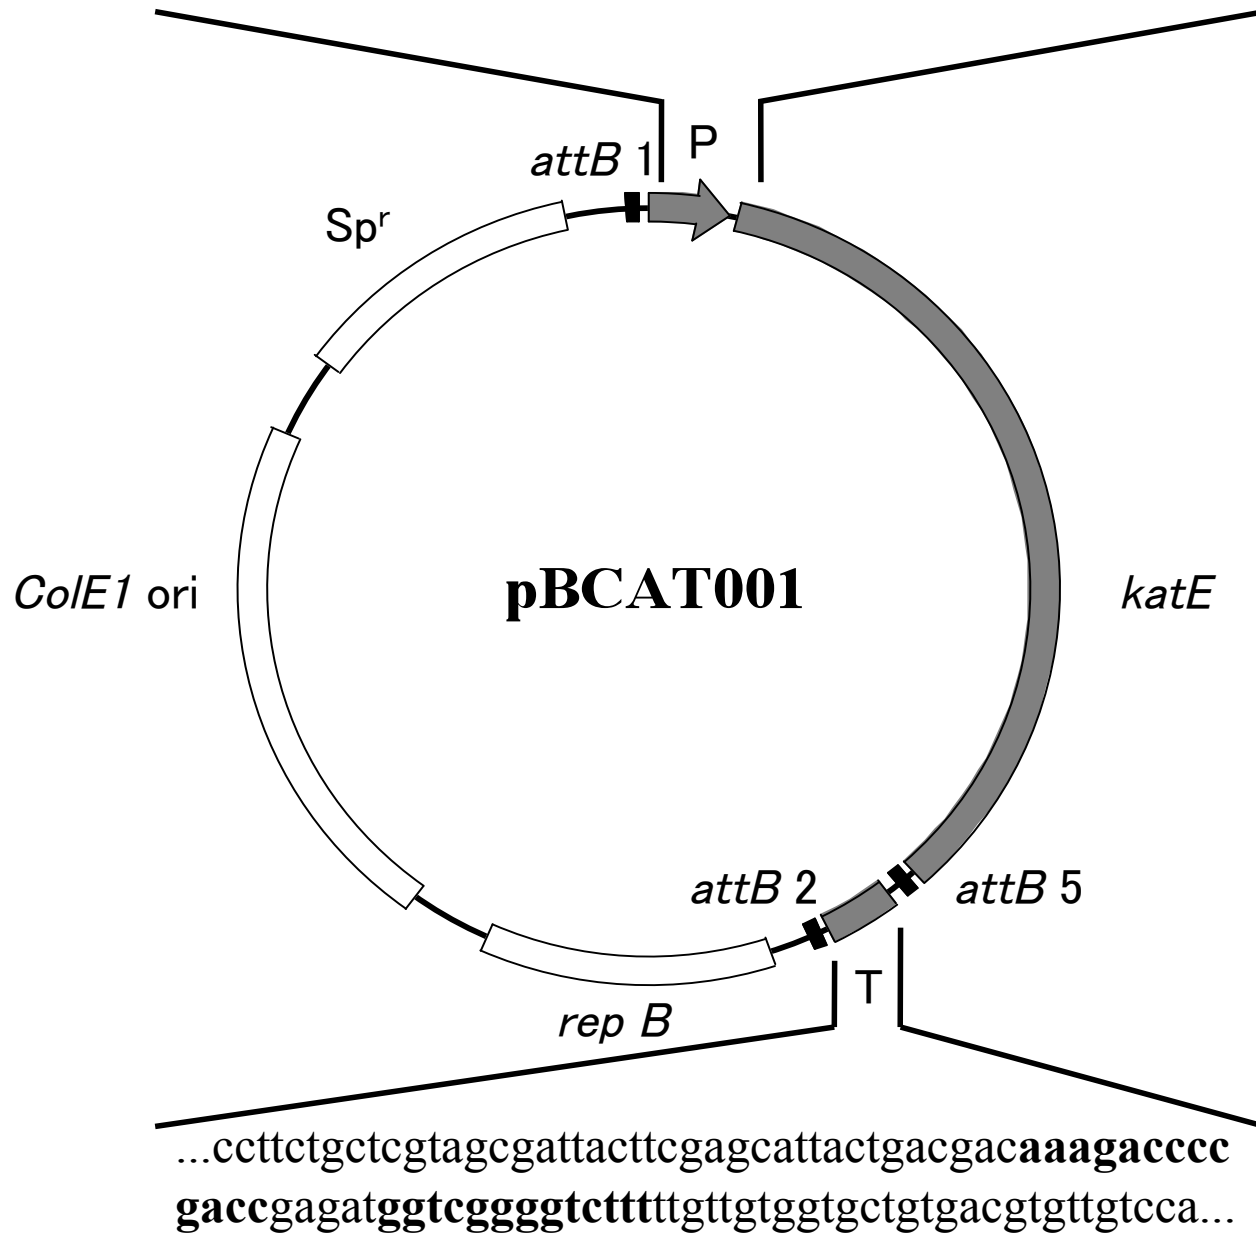

Supplement: supp_78.8.2988_AEM7093-11_FigS1.pdf [file supp_78.8.2988_AEM7093-11_FigS1.pdf]
