# Supplementary material
Source: PubMed Central journal article supplement (PMC3318838)
Supplement: supp_78.8.2988_AEM7093-11_supplemental_materials_tables.pdf [file supp_78.8.2988_AEM7093-11_supplemental_materials_tables.pdf]

## Supplemental Material

### Acquired Tolerance to Oxidative Stress in *Bifidobacterium longum* 105-A via the Expression of a Catalase Gene

**Bacterial strains and plasmids.** The bacterial strains and plasmids used in this study are listed in Table S1. Plasmids were constructed using *Escherichia coli* One Shot<sup>®</sup> Mach1<sup>™</sup> T1<sup>®</sup> and *E. coli* One Shot *ccdB* Survival<sup>™</sup> T1<sup>®</sup> as transformation hosts and were subsequently transferred to *B. longum* 105-A to assay catalase activity.

**Media and growth conditions.** *E. coli* and *B. subtilis* were grown in LB medium at 37 °C. For anaerobic culture, *B. longum* 105-A was grown in MRS medium (Difco, Franklin, New Jersey) containing 0.34% L-ascorbic acid sodium salt (Nacalai Tesque, Kyoto, Japan), 0.02% L-cysteine (Nacalai Tesque), and 50 mM sucrose at 37 °C. For aerobic culture, *B. longum* 105-A was grown in MRS medium containing 50 mM sucrose and 10 µM hemin (Sigma-Aldrich, St. Louis, MO) at 37 °C. When necessary, antibiotics were used at the following concentrations: chloramphenicol (Cm; 25 µg/mL), kanamycin (Km; 50 µg/mL) and spectinomycin (Sp; 75 µg/mL). Aerated cultures (10 mL) of *Bifidobacterium* were grown in 25-mL tubes using silicone plugs with shaking at 120 rpm. Anaerobic cultures (10 mL) were grown in 12-mL test tubes with screw caps. CFUs of *B. longum* 105-A were counted as follows: appropriate sample dilutions were prepared in sucrose solution (50 mM sucrose and 1 mM triammonium citrate, pH 6.0), plated on MRS agar, and incubated for 48 h at 37 °C under anaerobic conditions using the AnaeroPack system (Mitsubishi Gas Chemical, Tokyo, Japan).

**DNA manipulations.** General molecular biology techniques were used as described previously (4). Plasmids were extracted using a QIAprep Spin Miniprep kit (Qiagen, GmbH, Germany). The

restriction enzyme *StuI* was used as recommended by the supplier (TaKaRa, Ohtsu, Japan). PCR amplifications were performed using *KOD-Plus* DNA polymerase (Toyobo, Osaka, Japan) and *GoTaq* DNA polymerase (Promega, Madison, Wisconsin). When required, DNA fragments were isolated from agarose gels using a NucleoSpin<sup>®</sup> Extract II kit (MACHEREY-NAGEL, Düren, Germany). DNA was extracted using an UltraClean<sup>™</sup> Microbial DNA Isolation kit (MO BIO, Carlsbad, California). To construct expression plasmids, DNA elements were combined using the MultiSite Gateway<sup>®</sup> Pro kit (Invitrogen, Carlsbad, California). Sequence analysis was performed using an ABI3100 (Applied Biosystems, Foster City, California).

**Cloning of *B. subtilis katE*.** The plasmid pKKT427 is an *E. coli-Bifidobacterium* shuttle vector modified from a pBRASTA101 replicon (7). To construct the destination vector pGU100, pKKT427 was digested with *StuI* and ligated with Reading Frame Cassette A supplied with the Gateway<sup>®</sup> Pro kit. The *B. longum* 105-A *hup* terminator (*hupT*) was amplified with the primers attB5-*hupTf* and attB2-*hupTr*. pDONR52::*hupT* was constructed by BP recombination using the *hupT* fragment and the pDONR-221-P5-P2 vector. The catalase gene was cloned under the control of the *hup* promoter (Hp) (6). Hp was PCR amplified from the *B. longum* 105-A genome using primers *hup-f* and *hup-r*. For KatE production, *katE* was PCR-amplified from the *B. subtilis* genome using the primers *kat-f* and *kat-r*. The HpkatE fragment was amplified by overlap-PCR with Hp and KatE using primers *hup-f* and *kat-r*. pDONR15r::HpkatE was constructed by BP recombination using the HpkatE fragment and the pDONR221-P1-P5r vector. The plasmid pBCAT001 (Fig. S1) was constructed using pDONR15r::HpkatE, pDONR52::*hupT*, and pGU100 with the MultiSite Gateway<sup>®</sup> Pro kit. *B. longum* 105-A was transformed with the pKKT427 and pBCAT001 plasmids.

**Electroporation of *Bifidobacterium*.** Electrocompetent cells were prepared as described previously (8). Electroporation was performed using a Gene-Pulser (Bio-Rad, Berkeley, California)

set at 12.5 kV/cm and 200  $\Omega$  and employing a 2-mm cuvette (time constants were between 3.9 and 4.2 ms).

**Detection of catalase activity.** Cultures of *B. longum* 105-A harboring plasmids were grown overnight and then inoculated at a 1:50 dilution in fresh medium supplemented with spectinomycin. At an OD<sub>660</sub> of 1.0, 1.5 mL of each culture were centrifuged, and cells were washed twice with PBS and resuspended in 100  $\mu$ L of PBS. Aliquots (20  $\mu$ L) were mixed with 10  $\mu$ L of 30% H<sub>2</sub>O<sub>2</sub>. The presence of catalase activity results in bubble formation. Quantitative analysis of catalase activity was performed as described previous (1, 5). With some modification, the supernatant was 32-fold concentrated by Vivaspin 20 (molecular weight cutoff 3,000; GE Healthcare). At an OD<sub>660</sub> of 1.0, cultures were centrifuged, cells were resuspended in PBS, and total cellular proteins were extracted by French press (model 5615, Ohtake Works, Tokyo, Japan). The protein concentration was assayed by the Lowry method with bovine serum albumin as the standard.

**Determination of H<sub>2</sub>O<sub>2</sub> production.** Culture supernatants were diluted 3:2 with a solution of 0.2% Triton X-100, 0.01% horseradish peroxidase, and 0.63 mM *o*-dianisidine dihydrochloride in 50 mM acetate buffer, pH 5.0. The accumulation of H<sub>2</sub>O<sub>2</sub> in the culture medium was assayed spectrophotometrically at 460 nm by detecting the oxidation of *o*-dianisidine dihydrochloride.

**Survival after short-term H<sub>2</sub>O<sub>2</sub> exposure.** To test the level of H<sub>2</sub>O<sub>2</sub> tolerance of *B. longum* 105-A with or without *katE*, exponential-phase (OD<sub>660</sub> = 0.6) or stationary-phase (OD<sub>660</sub> = 1.0) cultures were incubated with 0 or 4.4 mM H<sub>2</sub>O<sub>2</sub> for 1 h at 37  $^{\circ}$ C in the presence of 10  $\mu$ M hemin. After 1 h, H<sub>2</sub>O<sub>2</sub> was eliminated by the addition of exogenous bovine catalase (10 U/mL, Sigma), and culture dilutions were plated on MRS agar and cultured for 48 h under anaerobic conditions. Survival rates (fold changes) were generated by comparing the CFU for 0 versus 4.4 mM H<sub>2</sub>O<sub>2</sub> exposure.

Survival rate increases were compared for *B. longum* 105-A (pBCAT001) and *B. longum* 105-A (pKKT427).

**Aerated cultures.** MRS medium containing 10  $\mu$ M hemin was inoculated with 200  $\mu$ L of anaerobically cultured *B. longum* 105-A. Aeration was performed using 25-mL tubes containing 10 mL of medium with shaking at 120 rpm under 37 °C. The accumulation of H<sub>2</sub>O<sub>2</sub> in the culture was assayed. Viable cells were counted using two methods, plate counting as described above and flow cytometry (Beckman Coulter, Brea, CA) using the LIVE/DEAD *BacLight* bacterial viability kit (L/D; Invitrogen).

1. **Li, Y., and H. E. Schellhorn.** 2007. Rapid kinetic microassay for catalase activity. *J. Biomol. Tech.* **18**:185-187.
2. **Matsumura, H., A. Takeuchi, and Y. Kano.** 1997. Construction of *Escherichia coli*-*Bifidobacterium longum* shuttle vector transforming *B. longum* 105-A and 108-A. *Biosci. Biotechnol. Biochem.* **61**:1211-1212.
3. **Mulvey, M. R., P. A. sorby, B. L. Triggs-Raine, and P. C. Loewen.** 1988. Cloning and physical characterization of *katE* and *katF* required for catalase HPII expression in *Escherichia coli*. *Gene.* **73**:337-345.
4. **Sambrook, J., E. F. Fritsch, and T. Maniatis.** 1989. *Molecular cloning: a laboratory manual*, 2<sup>nd</sup> ed. Cold Spring Harbor Laboratory, Cold Spring Harbor, N.Y.
5. **Sinha, A. K.** 1972. Colorimetric assay of catalase. *Anal. Biochem.* **47**:389–394.
6. **Takeuchi, A., H. Matsumura, and Y. Kano.** 2002. Cloning and expression in *Escherichia coli* of a gene, *hup*, encoding the histone-like protein HU of *Bifidobacterium longum*. *Biosci. Biotechnol. Biochem.* **66**:598-603.
7. **Tanaka, K., K. Samura, and Y. Kano.** 2005. Structural and functional analysis of pTB6 from *Bifidobacterium longum*. *Biosci. Biotechnol. Biochem.* **69**:422-425.

8. **Yasui, K., Y. Kano, K. Tanaka, K. Watanabe, M. Shimizu-Kadota, H. Yoshikawa, and T. Suzuki.** 2009. Improvement of bacterial transformation efficiency using plasmid artificial modification. *Nucleic Acids Res.* **37**:e3.

### Figure legend

**Fig. S1.** The map of pBCAT001 construction using the Gateway system. P: *hup* promoter; T: *hup* terminator; *katE*: *B. subtilis* heme-dependent catalase; Sp<sup>r</sup>: spectinomycin resistance; *repB*: *Bifidobacterium* replication initiation; *ColE1* ori: Colicine E1 origin of replication; *attB1*, *attB2*, *attB5*: Gateway system sites; bold: palindromes; italic: proposed -35 and -10; uppercase: proposed RBS; uppercase italic: the initiation codon (6).

**Fig. S2.** SDS-PAGE analysis of *E. coli* UM255 and *B. longum* 105-A. M: molecular mass marker (Daiichi, Tokyo, Japan); + : pBCAT001; - : pKKT427. The arrowhead indicates the KatE band of *E. coli* UM255 (pBCAT001) extract. The 77 kDa band corresponding to *B. subtilis* KatE was clearly identified in *E. coli* UM255 (pBCAT001), but was not identifiable in *B. longum* 105-A (pBCAT001) because its expression level was lower than 1/13 of that in *E. coli* UM255 (39 U/mg crude extract from *B. longum* and 511 U/mg crude extract from *E. coli*).

Table S1. Bacterial strains, plasmids, and primers used

| Strain or plasmid                                                          | Characteristic(s)                                                                                                                                                                                                                                                                        | Reference of Source |
|----------------------------------------------------------------------------|------------------------------------------------------------------------------------------------------------------------------------------------------------------------------------------------------------------------------------------------------------------------------------------|---------------------|
| <b>Bacterial strains</b>                                                   |                                                                                                                                                                                                                                                                                          |                     |
| <i>Bacillus subtilis</i> GTC01672                                          | Wild type                                                                                                                                                                                                                                                                                | GTC <sup>c</sup>    |
| <i>B. longum</i> 105-A                                                     | Wild type                                                                                                                                                                                                                                                                                | 2                   |
| <i>E. coli</i> One Shot Mach1 <sup>TM</sup> T1 <sup>R</sup>                | F- $\phi$ 80( <i>lacZ</i> ) $\Delta$ M15 $\Delta$ <i>lacX74</i> <i>hsdR</i> ( <i>rK<sup>-</sup>mK<sup>+</sup></i> ) $\Delta$ <i>recA1398</i> <i>endA1</i> <i>tonA</i>                                                                                                                    | Invitrogen          |
| <i>E. coli</i> One Shot <i>ccdB</i> Survival <sup>TM</sup> T1 <sup>R</sup> | F- <i>mcrA</i> $\Delta$ ( <i>mrr-hsdRMS-mcrBC</i> ) 80 <i>lacZ</i> $\Delta$ M15 $\Delta$ <i>lacX74</i> <i>recA1</i> <i>ara</i> $\Delta$ 139 <i>D</i> ( <i>ara-leu</i> )7697 <i>galU</i> <i>galK</i> <i>rpsL</i> ( <i>StrR</i> ) <i>endA1</i> <i>nupG</i> <i>tonA::Ptrc</i> - <i>ccdA</i> | Invitrogen          |
| <i>E. coli</i> UM255                                                       | <i>pro leu rpsL hsdM hsdR end1 lacy katG2 katE::Tn10 recA</i>                                                                                                                                                                                                                            | 3                   |
| <b>Plasmids<sup>a</sup></b>                                                |                                                                                                                                                                                                                                                                                          |                     |
| pDONR <sup>TM</sup> 221-P1-P5r                                             | pDONR <sup>TM</sup> 221; Cm <sup>r</sup> Km <sup>r</sup> ; <i>ccdB</i> ; attP1; attP5r                                                                                                                                                                                                   | Invitrogen          |
| pDONR <sup>TM</sup> 221-P5-P2                                              | pDONR <sup>TM</sup> 221; Cm <sup>r</sup> Km <sup>r</sup> ; <i>ccdB</i> ; attP5; attP2                                                                                                                                                                                                    | Invitrogen          |
| pDONR15r::HpkatE                                                           | pDONR <sup>TM</sup> 221-P1-P5r; Km <sup>r</sup> ; carrying the <i>B. subtilis katE</i> ; <i>hup</i> promoter                                                                                                                                                                             | This study          |
| pDONR52::hupT                                                              | pDONR <sup>TM</sup> 221-P5-P2; Km <sup>r</sup> ; carrying the <i>hup</i> terminator                                                                                                                                                                                                      | This study          |
| pKKT427                                                                    | Sp <sup>r</sup> ; A shuttle vector between <i>E. coli</i> and <i>Bifidobacterium</i> , 3.9 kb modification of pBRATA101                                                                                                                                                                  | 8                   |
| pGU100                                                                     | pKKT427; Cm <sup>r</sup> , Sp <sup>r</sup> ; <i>ccdB</i> ; Reading Frame Cassette A                                                                                                                                                                                                      | This study          |
| pBCAT001                                                                   | pKKT427; Sp <sup>r</sup> ; carrying the <i>B. subtilis katE</i> ; <i>hup</i> promoter                                                                                                                                                                                                    | This study          |
| <b>Primers<sup>b</sup></b>                                                 |                                                                                                                                                                                                                                                                                          |                     |
| kat-f                                                                      | atgagtgatgaccaaaca                                                                                                                                                                                                                                                                       | This study          |
| kat-r                                                                      | <i>ggggacaactttgtatacaaagttgtcaaattcgctatcccaat</i>                                                                                                                                                                                                                                      | This study          |
| hup-f                                                                      | <i>ggggacaagttgtacaaaaagcaggctttccgcactttgct</i>                                                                                                                                                                                                                                         | This study          |
| hup-r                                                                      | <i>ttggtcatcactataaaagcatccttctggg</i>                                                                                                                                                                                                                                                   | This study          |
| attB5-hupTf                                                                | <i>ggggacaactttgtatacaaagttgcctctgctcgtagcgatta</i>                                                                                                                                                                                                                                      | This study          |
| attB2-hupTr                                                                | <i>ggggaccactttgtacaagaagctgggtatggaagcgcgtaactagtc</i>                                                                                                                                                                                                                                  | This study          |

<sup>a</sup> Cm<sup>r</sup>, Km<sup>r</sup> and Sp<sup>r</sup>, resistance to chloramphenicol, kanamycin, and spectinomycin, respectively.

<sup>b</sup> Italicized oligonucleotide sequences denote the *attB* sites.

<sup>c</sup> Gifu Type Culture Collection (GTC), from Gifu University Culture Collection (GIFU), Department of Microbiology, Gifu University School of Medicine.

Table S2. The catalase activities of crude extract. (U/mg)

| Hemin <sup>a</sup> | <i>B. longum</i> 105-A<br>(wild type) | <i>B. longum</i> 105-A<br>(pKKT427) | <i>B. longum</i> 105-A<br>(pBCAT001) |
|--------------------|---------------------------------------|-------------------------------------|--------------------------------------|
| +                  | nd                                    | nd                                  | 39                                   |
| -                  | nd                                    | nd                                  | nd                                   |

<sup>a</sup> +, addition of hemin in medium; -, no hemin in medium.  
 Under anaerobic condition, OD<sub>660</sub> = 1.0.  
 nd, not detected. (less than 0.1 U/mg)
