# Supplementary material
Source: PubMed Central journal article supplement (PMC3318838)

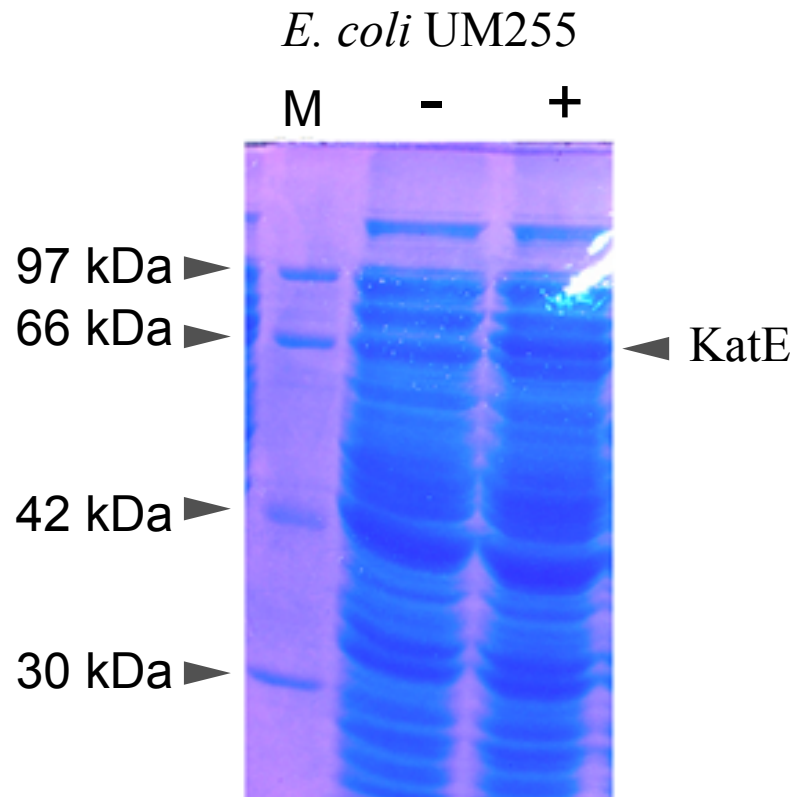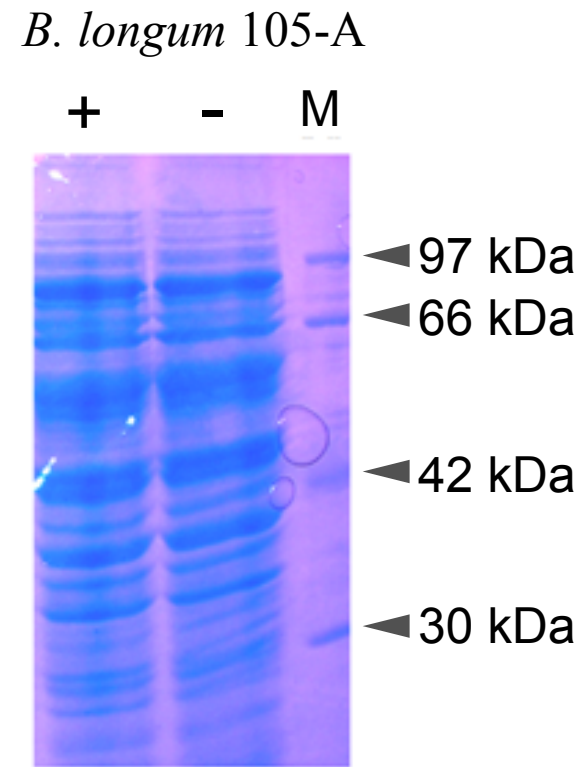

Supplement: supp_78.8.2988_AEM7093-11_FigS2.pdf [file supp_78.8.2988_AEM7093-11_FigS2.pdf]
